# 1 **Emergence of consistent intra-individual locomotor patterns during zebrafish** 2 **development**

3 Jennifer A. Fitzgerald<sup>1</sup>, Krishna T. Kirla<sup>1,2</sup>, Carl P. Zinner<sup>3</sup>, Colette M. vom Berg<sup>\*1</sup>

4 <sup>1</sup> *Eawag, Swiss Federal Institute of Aquatic Science and Technology, Department of*  
5 *Environmental Toxicology, Dübendorf, 8600, Switzerland*

6 <sup>2</sup> *current affiliation: AstraZeneca, Patient Safety, Pepparedsleden 1, Mölndal 43183,*  
7 *SWEDEN*

8 <sup>3</sup> *ETH Alumni Association, Rämistrasse 101, 8092 Zürich, Switzerland*

9 \*corresponding author: [colette.vomberg@eawag.ch](mailto:colette.vomberg@eawag.ch)

10

## 11 **Abstract**

12 The analysis of larval zebrafish locomotor behavior has emerged as a powerful indicator of  
13 perturbations in the nervous system and is used in many fields of research, such as  
14 neuroscience, toxicology or drug discovery. The behavior of larval zebrafish, however, is  
15 highly variable, resulting in the use of high numbers of animals and the inability to detect  
16 small effects. In this study, we analyzed whether individual locomotor behavior is stable over  
17 development and whether behavioral parameters correlate with physiological and  
18 morphological features of the larvae, with the aim to better understand variability and  
19 predictability of larval locomotor behavior. We found that locomotor activity of individuals is  
20 consistent within the same day and becomes predictable during development especially  
21 during dark phases, when larvae are performing exploratory light-searching behavior and  
22 display increased activity. Stimulus induced startle responses were less predictable for an  
23 individual, and response strength did not correlate with inherent locomotor activity. Moreover,  
24 locomotor activity was not associated with physiological and morphological features of the  
25 larva (resting heart rate, body length, size of the swim bladder). These findings highlight the

26 areas of intra-individual consistency, which could be used to improve the sensitivity of assays  
27 using zebrafish locomotor activity as an endpoint.

28

## 29 **Introduction**

30 The ontogeny of zebrafish locomotor behavior and the underlying maturation of the  
31 locomotor network has been subject of extensive studies, fueled by the vast variety of  
32 genetic, molecular, physiological and behavioral tools developed for this prominent  
33 vertebrate model organism. The first embryonic movements start around 17 hours post  
34 fertilization, but it is not until 2-3 days post fertilization (dpf) that the larvae swim  
35 spontaneously<sup>1,2</sup>. This swim pattern is initially infrequent and in bursts, that slowly transitions  
36 into beat-and-glide swimming mode after swim bladder inflation and before feeding at 5 dpf  
37 <sup>3,4</sup>. This sequence of events and the underlying cellular mechanisms are described in the  
38 literature<sup>5-7</sup>, and as a result, the analysis of zebrafish locomotor activity has become a  
39 popular read-out to assess the impact of external challenges to the nervous system in many  
40 fields of research. The amenability to high-throughput, non-invasive analysis, which allows  
41 cost-, material- and time-effective testing as compared with other vertebrate model  
42 organisms, additionally contributes to the popularity of zebrafish behavioral assays.  
43 Moreover, the availability of commercial plug and play systems (e.g. from Noldus, Viewpoint  
44 or Loligosystems) has facilitated behavior data acquisition and analysis, making this an  
45 endpoint that can now be readily used. These locomotor tests, however, suffer from high  
46 inter-individual variability and small but important effects can neither robustly nor repeatedly  
47 be detected<sup>8-14</sup>.

48 Behavioral inter-individual variability is common within populations of organisms, and the  
49 concept of individuality and personality has been reported for humans<sup>15,16</sup>, birds<sup>17,18</sup>, fish<sup>19</sup>,  
50 and other species<sup>20,21</sup>. Behavioral variability can arise from genetic, developmental,  
51 pharmacological, environmental and social processes<sup>22,23</sup> and plays an essential role in the  
52 response and adaptation of a population to environmental changes<sup>24-26</sup>. Despite this

53 importance, the variation among individuals is often ignored when behavior is quantified as  
54 averages with associated dispersions and individuals within a group are generally considered  
55 as simple replicates<sup>27-30</sup>. However, environmental changes can affect variation without  
56 changing the mean and potential biological significance is obscured when such variation is  
57 ignored. Therefore, it is important to address and understand these differences between  
58 individual behaviors as it could facilitate the understanding of an individual's response during  
59 environmental adaption<sup>25,26</sup>.

60 However, inter-individual differences within a population are not the only issue that results in  
61 large variation within, especially behavioral, experiments. High variability within an  
62 individual's own response can also contribute to variation, with these intra-individual  
63 differences mainly attributed to ontogenetic and environmental effects<sup>31-33</sup>. While intra-  
64 individual consistency in behavior has been widely addressed in primates and rodents,  
65 aquatic models are less characterized in this regard despite their increasing use in  
66 behavioral trials<sup>19</sup>. For the testing of acute effects on the nervous system, whether of  
67 toxicants, drugs, stressors or other perturbations, the existence of intra-individual  
68 consistency of locomotor behaviors in early larval zebrafish stages would allow baseline  
69 measures of locomotor activities of all individuals prior to exposure to which effects can then  
70 be normalized to. This would allow a better estimation of effects, especially if these are small,  
71 thereby increasing the sensitivity of such tests.

72 Therefore, the goal of this study was to test whether consistency of locomotor activity of an  
73 individual zebrafish emerges during larval development and under which conditions this may  
74 occur. Given that light conditions shape locomotor patterns differently<sup>34-37</sup>, we hypothesized  
75 that intra-individual consistency might vary under different light conditions. In addition, we  
76 tested whether consistency can be observed from stimulus-triggered activity responses and  
77 whether individual differences can be attributed to physiological or morphological features of  
78 the larva.

80 **Results:**

81 ***Locomotor behavior is most predictable in darkness***

82 To study the consistency of locomotor behavior of an individual larva over time, a total  
83 number of 132 mixed wildtype (WM) larvae were subjected to different behavior tests at two  
84 time points (9am and 2pm) over three consecutive days (5, 6 and 7 days post fertilization,  
85 dpf; Fig.1a). As the locomotor behavior of zebrafish larvae changes under different light  
86 conditions<sup>34-37</sup>, we analyzed spontaneous swimming after a 20 min period of acclimatization  
87 (referred to as “spontaneous”), swimming under darkness (2 x 10 min, referred to as “dark  
88 intervals”) and swimming in light after periods of darkness (2 x 10 min, referred to as “light  
89 intervals”) (Fig. 1a). Fig. 1a demonstrates short peaks of increased activity at the light  
90 switches as well as heightened locomotor activity during dark intervals. In addition, we  
91 investigated whether inherent locomotor activity of individual larvae relates to their activity  
92 during startle responses, triggered firstly through 4 one second dark flashes (Fig. 1b) and  
93 secondly by using a tapping stimulus device integrated in the behavior system<sup>38</sup> (Fig. 1c). We  
94 chose an inter-stimulus interval of 90 seconds to measure the startle response from an  
95 individual repeatedly without inducing habituation. Short peaks of increased activity occurring  
96 immediately after stimulus application indicate that startle responses were triggered with  
97 these two protocols. The activity and radial index were measured to characterize the  
98 swimming behavior during the tests. The activity index is the percentage of time the  
99 individual moves within one-second intervals. The radial index indicates where the larva  
100 moves within the well and is calculated based on the distance of each larva in respect to the  
101 wall. Smaller indexes represent closeness to the wall and larger indexes represent more  
102 central locations. Although these parameters have been shown to be independent of each  
103 other<sup>39</sup>, for our data we can confirm this only for certain experimental protocols depending on  
104 when the experiment took place (Supp. Tab. 1).

105 We found that intra-individual variability was consistently low during dark intervals, while it  
106 was gradually decreasing over development during spontaneous swimming and light

107 intervals (Fig. 2a). Differences in activity distribution could explain these changes, as the  
108 activity of fish is lower under spontaneous and light intervals compared to dark intervals.  
109 Most fish either do not move or display low activity during the spontaneous and light intervals  
110 while during dark intervals most fish display activity but the amount they move varies and is  
111 larvae dependent (Fig. 2b). This is further supported, as the lower coefficient of variation  
112 (CV) generally resulted from a higher mean activity rather than a smaller standard deviation  
113 (Supp. Fig. 1a - c), indicating that the more the larvae move, the less variable their  
114 movements are.

115 Considering that the intra-individual variability was lowest during dark intervals, we analyzed  
116 whether an individual's activity is consistently high or consistently low under dark conditions  
117 during development by looking at the correlation of activity between the different days (5, 6, 7  
118 dpf) and time of day (9am and 2pm). There was a strong correlation between measurements  
119 taken at 9am compared to 2pm for all days measured (5 dpf:  $r = 0.755$ ,  $p < 0.05$ ; 6 dpf:  $r =$   
120  $0.541$ ,  $p < 0.05$ ; 7 dpf:  $r = 0.875$ ,  $p < 0.05$ ; Fig. 2c), indicating that there was no effect of time  
121 of day on the larvae's behavioral response to dark intervals. When looking at the different  
122 days, correlations were observed for all days (Fig. 2c), but the strongest correlations  
123 occurred between day 6 and 7 ( $r = 0.745$ ,  $p < 0.05$ ; Fig. 2d), suggesting that an inherent  
124 locomotor activity emerges at day 6. Interestingly, activity during spontaneous swimming was  
125 less predictable (Fig. 2e), although still showing a correlation, albeit weaker, between day 6  
126 and 7 ( $r = 0.406$ ,  $P < 0.05$ ; Fig. 2f). In addition, for light intervals, the interactions were even  
127 more unpredictable (Fig. 2g): Most comparisons resulted in no correlation, and the  
128 correlation between day 6 and 7, although significant, was very weak ( $r = 0.272$ ,  $p < 0.05$ ;  
129 Fig. 2h), potentially as a result of the higher variance and lack of activity the fish displayed  
130 (Fig. 2a and b).

131 To see if the larvae can adapt to the experimental procedure, we additionally tested whether  
132 the correlations improved by starting the test on day 4. Due to the larvae's lack of activity at 4  
133 dpf, no significant trends could be determined when comparing day 4 to the other days, for

134 any of the periods measured (Supp. Fig. 2). For light intervals, a slight increase in the  
135 strength of the correlations was observed, especially for 2pm measurements (Supp. Fig. 2),  
136 potentially due to a reduction in variation in the data that is observed from a high 5 dpf CV in  
137 the 3 day experiment.

138 When considering the location of the larvae in the well, less intra-individual variability occurs  
139 between the different experimental conditions tested, compared to the activity index (Fig. 3a).  
140 This indicates that larvae move very consistently, either swimming close to the wall or in the  
141 middle of the well, independent of the light conditions. Interestingly, between the different  
142 days and time points there is a larger proportion of significant interactions (Fig. 3e, f and g),  
143 albeit the actual strength of correlation tends to be weaker for the radial index compared to  
144 the activity index (e.g. for dark intervals- radial index:  $r = 0.694$ ,  $p < 0.05$ ; Fig. 3b, activity  
145 index:  $r=0.745$ ,  $p < 0.05$ ; Fig. 2d). This demonstrates that the radial index was less able to  
146 predict the movement between the two days compared to the activity index.

147 In summary, we show that although the activity patterns slightly differ between mornings and  
148 afternoons, individual zebrafish larvae move consistently, thus individuals with a high activity  
149 level in the morning also have a high activity level in the afternoon. Moreover, in darkness,  
150 when zebrafish larvae show hyperactivity compared to light conditions (Fig. 1a), intra-  
151 individual activity and radial index are most consistent and become highly predictable from  
152 day 6.

### 153 ***Startle responses are not consistent for an individual***

154 We tested whether inherent locomotor activity of individual larvae related to activity during a  
155 startle response, triggered from two different protocols (“dark flash” and “tapping”) (Fig. 1b  
156 and 1c), as well as induced when switching the lights on (“onset”) and off (“offset”) (Fig 1a).  
157 The strength of the startle responses was measured by calculating the distance moved  
158 during one second after the stimulus was applied. The average responses to each trigger  
159 showed some differences, however, no clear trend is discernible (Fig. 4a). In addition, the  
160 individual responses seem to show neither a consistency nor a uniform decrease in strength

161 over the different stimuli, for both tapping (Fig. 4b) and dark flashes (Supp. Fig. 3),  
162 suggesting that fish are not consistently habituating to the stimuli. Indeed, when calculating a  
163 habituation index (HI) over the 4 stimuli, habituation occasionally occurs, but is not consistent  
164 for an individual over development (Supp. Fig. 4).

165 Looking closer at individual consistency, we found a significant, albeit only moderate  
166 correlation when comparing the response from the first tapping stimulus between 6 and 7 dpf  
167 at 9am ( $r = 0.423$ ,  $p < 0.05$ ; Fig. 4c). However, for responses in the afternoon this correlation  
168 becomes negative ( $r = -0.404$ ,  $p < 0.05$ ; Fig. 4c), potentially due to the larvae reducing their  
169 activity at 2pm compared to 9am which is supported by the comparison of the average  
170 distance moved between those periods (7 dpf 9am average distance moved:  $0.138 \pm 0.20$ ; 7  
171 dpf 2pm average distance moved:  $0.041 \pm 0.11$ ;  $p < 0.05$ ; Fig. 4a). The significance of this  
172 correlation weakens with each tapping stimulus and is ultimately lost (Fig. 4c). Interestingly,  
173 this trend was not seen at all for the dark flash stimulus, where no significant correlations  
174 between the response of the fish on day 6 to 7 for either 9am or 2pm, irrelevant of the  
175 stimulus number, was detected (Fig. 4c). The same inconsistency was found for responses  
176 triggered at onset and offset of light switches (Supp. Tab. 2).

177 When cross-comparing responses to tapping stimuli and dark flashes, we found a weak  
178 correlation for the first stimulus at day 6 ( $r = 0.406$ ,  $p < 0.05$ ; Fig. 4d). However, this was not  
179 consistently seen for all days or time points studied (Supp. Tab. 2), supporting further that  
180 the larvae's response to a startle stimulus is not predictable or consistent at the individual or  
181 population level. Moreover, when comparing an individual's inherent locomotor activity with  
182 startle response strength, no strong correlations were found for the different protocols used  
183 under all light conditions (Supp. Tab. 3), suggesting that the beat-and-glide swim mode does  
184 not relate to an individual's startle response capabilities, irrespective of the stimulus modality.

### 185 ***Locomotor activity is not associated with physiology and morphology***

186 Resting heart rates in individual larvae can vary. We tested if this property links to their  
187 inherent locomotor activity. The resting heart rates of our WM larvae lies within a broad

188 range of 118.60 – 225.46 beats per minute at 5 dpf with a mean of 185.55 BPM ( $\pm$  21.94).  
189 The mean did not significantly change at 6 dpf (mean =  $186.51 \pm 16.17$ ), but at 7 dpf there  
190 was a significant decrease compared to day 5 and 6 (mean =  $176.63 \pm 21.58$ ,  $p < 0.05$ ) (Fig.  
191 5a). Despite this, the resting heart rate of an individual was significantly consistent over the  
192 three days measured (Fig. 5b, Supp. Tab. 4). However, although the resting heart rate and  
193 locomotor activity for an individual are consistent during development, they did not correlate  
194 with activity during dark intervals (5 dpf:  $r = 0.146$ ,  $p = 0.10$ ; 6 dpf:  $r = -0.015$ ,  $p = 0.86$ ; 7 dpf:  
195  $r = 0.084$ ,  $p = 0.34$ ; Fig. 5c) or for the other light conditions tested (Supp. Fig. 5a and b).

196 We further assessed morphological features of the larvae and tested whether they are  
197 consistent over time for each individual and whether they would underlie the differences in  
198 locomotor activity among the individuals. Body length was significantly smaller at day 5  
199 compared to the other days, but there was no significant increase from day 6 to 7 (Fig. 5d),  
200 with size strongly correlated between the days tested, suggesting that the individuals grow at  
201 a constant pace (Fig. 5e, Supp. Tab. 4). Again during dark intervals, there was no strong  
202 correlation between activity of the larvae and their body length (Fig. 5f), with similar patterns  
203 observed for spontaneous movement and light intervals (Supp. Fig. 5c and d). Similarly, for  
204 the size of the swim bladder, fish that had a large swim bladder on day 5 consistently had  
205 larger swim bladders on day 6 and 7 (Fig. 5h, Supp. Table 4). However, on average, swim  
206 bladders appeared significantly smaller on day 7 compared to day 6 (Fig. 5g), potentially  
207 because of a change in shape, as the developing swim bladder undergoes a process to  
208 eventually form a double-chambered swim bladder in the adult stage<sup>40,41</sup>. There was no  
209 significant correlation between the activity of larvae under dark intervals and the size of the  
210 swim bladder, although for day 5 there was a slight trend towards fish with smaller swim  
211 bladders moving more (Fig. 5j), which was also seen for spontaneous movement and light  
212 intervals (Supp. Fig. 5e and f).

213

214



## 215 Discussion

216 Behavioral diversity of a population can be observed throughout the animal kingdom in  
217 genetically diverse and even in isogenic populations<sup>42,43</sup> and behavioral inter-individual  
218 variability as well as inter-strain variability is increasingly reported for laboratory strains of  
219 zebrafish kept for long periods of time<sup>44-49</sup>. Despite this, variation among individuals is often  
220 ignored when behavior is quantified as averages with associated distributions<sup>24,27-30</sup>.  
221 Therefore, in this study, we aimed to address the hypothesis that despite the high inter-  
222 individual variability in zebrafish locomotor activity, intra-individual consistency might emerge  
223 during larval development, possibly shaped by different light conditions and physical  
224 properties of the larvae.

225 Our data shows that locomotor activity begins to become predictable for an individual during  
226 development around 6 dpf, especially during darkness-induced explorative behavior. We also  
227 demonstrate that locomotor activity does not correlate with physiological and morphological  
228 features in larval stages, although these features are consistent within an individual. These  
229 conclusions are supported by previous research showing that swimming behavior is  
230 predictable between individuals when swimming freely in identical wells<sup>39</sup>. Roman *et al.*  
231 identified a histone H4 acetylation pathway that modulates individual behavior in a genetics-  
232 independent manner without affecting the global average behavior of the population.  
233 Therefore, while the average behavior might mostly depend on genetic background or  
234 environmental changes, behavioral inter-individual variability could result from histone H4  
235 acetylation differences.

236 The most consistent period for all behavior parameters measured was between 6 and 7 dpf,  
237 with the most predictable activity under dark intervals, compared to spontaneous and light  
238 intervals. Spontaneous locomotion in zebrafish larvae has been shown to follow a non-  
239 random pattern even in the absence of sensory cues, facilitating the detection of resources  
240 or shelter<sup>50</sup>. Driven by the dwindling nutritional stock supplied from the yolk, the developing  
241 larva starts actively hunting for food from around 5 days post fertilization. This predation is

242 strongly dependent on a functional visual system, as larvae in darkness or with impaired  
243 vision are unable to locate prey<sup>51,52</sup>. Accordingly, upon change of light conditions, larvae  
244 engage in different light-search behaviors to locate prey. These include phototaxis, where  
245 light is restricted to an area and movements towards the light source are guided by retinal  
246 input<sup>53,54</sup>, or dark photokinesis, where illumination is completely lost, and locomotion is  
247 strongly increased<sup>34,35</sup> and largely driven by non-retinal deep-brain photoreceptors  
248 expressing the light-sensitive pigment melanopsin<sup>36</sup>. Recent findings, however, show that  
249 heightened locomotor activity of the larvae during darkness is not random and undirected, as  
250 implied by the definition of photokinesis, but rather structured and resembles an area-  
251 restricted local search in a first phase followed by a more outward-directed roaming search to  
252 efficiently detect light sources<sup>37</sup>. With increasing age, decreasing yolk and under dark  
253 conditions, search strategy behavior becomes more important for the larvae and likely  
254 causes individuals to unwind their hard-wired program. This possibly explains our finding that  
255 the intra-individual consistency is highest under dark conditions and with advanced larval age  
256 under unfed conditions.

257 We performed our tests during 5 to 7 days post fertilization, as we aimed to find conditions  
258 for consistency in a standard well plate and for ages that are frequently used for zebrafish  
259 behavior studies. In addition, we chose this period to be able to test under unfed conditions,  
260 to avoid introducing another variable through feeding behavior. Food can introduce  
261 confounding factors in a high-throughput testing set up for drugs, pollutants or other  
262 perturbations, so identifying specific predictable periods for behavior testing without food is  
263 preferable<sup>55,56</sup>. To avoid potential feeding state-related behavioral changes we stopped our  
264 tests at 7 dpf, although larvae can survive up to 10 days without food<sup>57</sup>. It would, however, be  
265 interesting to investigate whether the observed consistency persists until adulthood, as for  
266 adult zebrafish activity levels have also been shown to be consistent over several days<sup>58</sup>, and  
267 whether social interactions among the individuals could influence the consistency of this  
268 behavior. For some fish species, such as the Amazon molly (*Poecilia Formosa*)<sup>42</sup> or the  
269 mangrove killifish (*Kyptolebias marmoratus*)<sup>59</sup> direct social experience did not influence the

270 repeatability of behavior in individuals, despite the importance of social interactions in these  
271 species<sup>60</sup>. Yet in other species (e.g. guppy, *Poecilia reticulata*<sup>61</sup>; rainbow trout,  
272 *Onchorhynchus mykiss*<sup>62</sup> and cichlid, *Neolamprologus pulcher*<sup>63</sup>), the social environment was  
273 shown to affect consistent individual behaviors and the development of animal  
274 personalities<sup>64</sup>.

275 Variability in zebrafish locomotor activity has previously been reported to decrease in the  
276 afternoon between 13.00 pm and 15.30 pm<sup>11</sup>, a result that we could not recapitulate with our  
277 data. In fact, during dark intervals we found that the variability was moderately higher in the  
278 afternoons at 5 and 7 dpf. A possible explanation for this discrepancy is the difference in  
279 protocols as well as light conditions used between our study and the one performed by  
280 MacPhail *et al.*. When testing for time of the day effect MacPhail *et al.* kept their larvae under  
281 infrared light in constant darkness throughout the period of testing, i.e. from 10.00 am to  
282 15.30 pm, which might have resulted in less variability of the larvae's locomotor activity when  
283 tested in the afternoon. In contrast, in our study, larvae were maintained in normal light  
284 conditions between the two test points within one day, in order to mimic natural circadian  
285 light conditions and rhythms as closely as possible. Our data also revealed a high intra-  
286 individual consistency between morning and afternoon locomotor activity for all days tested  
287 and under all light conditions. This within-day consistency allows researchers interested in  
288 acute effects to record the baseline activity before the manipulation and thus calculating the  
289 effects more precisely.

290 By 5 dpf, zebrafish larvae perform a repertoire of simple sensorimotor behaviors that operate  
291 on characterized and accessible neural circuits<sup>34,65-67</sup>. For example, exposure to abrupt  
292 acoustic stimuli elicits a startle response, an evolutionary conserved and stereotyped yet  
293 modifiable behavior. Previous research has shown that zebrafish larvae habituate to a startle  
294 response. Best *et al.* demonstrated that zebrafish larvae (7 dpf) exhibit frequent reduction in  
295 response to a series of acoustic stimuli<sup>68</sup>. Wild-type larvae at 5dpf have also been shown to  
296 rapidly reduce their startle response initiation and stereotypically habituate by more than 80%

297 when exposed to a series of acoustic stimuli<sup>69</sup>. In our study, the larvae's startle response was  
298 very inconsistent and unpredictable, for either the dark flashes or tapping stimulus. There  
299 was one exception, with the responses of the first tapping stimulus showing moderate  
300 correlation between day 6 and 7. This correlation weakened over the 4 stimuli potentially as  
301 a result of inter-individual differences in startle response habituation, where some larvae  
302 habituated to the stimulus while others did not. Such individuality in habituation was reported  
303 for the acoustic startle response by Pantoja *et al.* who showed that the degree of habituation,  
304 despite being diverse, is stable and heritable for an individual<sup>70</sup>.

305 Although our data indicates occasional occurrences of habituation, consistency for an  
306 individual, as seen in previous studies, was not apparent. This may be due to the differing  
307 startle protocols and different well sizes used for all the studies. The inter-stimulus intervals  
308 lasted from 1 second<sup>68,69</sup> to 5 seconds<sup>70</sup> in the other studies, while in our study it was 90  
309 seconds, which is much less likely to induce habituation. Moreover, in our setup, the  
310 response may have been limited by the size of the well. For example, larvae that are located  
311 close to the well edge when the stimulus is triggered, may respond with a small, or large  
312 swimming distance depending on the direction of turning. Following the radial index over time  
313 indicates that larvae reach the edge of the well during a startle response (see Fig. 1a -1c).  
314 Therefore, intra-individual consistency in startle response habituation might be masked in a  
315 standard 48-well plate.

316 Previous studies have seen strong links between the behavior and morphology of a fish. A  
317 study by Hawkins and Quinn (1996) investigated if morphological and physiological traits  
318 explained variations in critical swimming speed and found that the best swimming fish had  
319 longer caudal regions than the poorer swimmers<sup>71</sup>. Larger brown trout have also been shown  
320 to have greater stamina and attained higher swimming speeds than smaller fish, along with  
321 maximum swimming speed additionally correlating with fish size<sup>72</sup>. Studies with juvenile  
322 zebrafish have shown that individual body size had a strong effect on the activity-boldness  
323 relationship, where smaller fish were bolder and less active while larger fish were more

324 cautious and active<sup>73</sup>. In our study, despite strong intra-individual consistency, no such links  
325 between behavioural movements and morphological or cardiophysiological parameters were  
326 observed under any of the conditions measured. This difference between our data and this  
327 literature may be as a result of our study occurring over development. However, other  
328 literature is in line with our findings in terms of the lack of this link, as for the bluegill sunfish  
329 (*Lepomis macrochirus*), neither boldness nor locomotion activity correlated to the body size  
330 or condition of the fish<sup>74</sup>. Importantly, locomotor activity was shown to be independent of  
331 weight and body length in adult zebrafish<sup>58</sup>. Therefore, the link between morphology and  
332 behaviour may be dependent on the age, conditions and type of behaviour investigated.

333 Scientific research is constantly under intense scrutiny, specifically for the occurrence of  
334 irreproducible and non-comparable findings. In particular, high-throughput behavioral tests  
335 frequently result in inconsistent findings, which researchers attribute to poor quality science  
336 and non-standardized protocols<sup>9-13</sup>. However, this problem also strongly links to the lack of  
337 understanding of the variability of basic behavioral patterns, as fish fundamentally change  
338 their swimming behavior over time<sup>1-7,75</sup>. Considering such changes along with the variability  
339 would allow the design of a statistically more robust experiment yielding relevant and reliable  
340 results. The data from our study is important in helping the development and generation of  
341 reproducible zebrafish behavioral data, such as those generated in neurotoxicity or drug  
342 discovery tests<sup>8,76-79</sup>. Our results indicate that the behavioral locomotor machinery of an  
343 individual, although still under maturation, becomes stable over those key larval stages that  
344 are frequently used for testing (6-7 dpf). This stability manifests after the establishment of the  
345 beat-and glide swim mode and strengthens when the locomotor network calls upon during  
346 darkness-induced exploration, and results in consistent period at 6dpf under dark intervals. In  
347 addition, measures between morning and afternoon showed a high intra-individual  
348 consistency for all days and light conditions tested. The revealed intra-individual consistency  
349 provides some basis to improve the estimation of acute behavioral effects of substances and  
350 other types of treatments through pre-post exposure measurements. In addition, this study  
351 has highlighted areas where high levels of inter- and/or intra- individual variability occur,

352 specifically for the response to a startle stimulus and morphological and cardiophysiological  
353 features of the larvae which should be accounted for when used in future studies. This data  
354 not only highlights the need to consider the design and experimental setup/conditions but  
355 also provides a basis to allow future studies to account for variability when using zebrafish  
356 locomotor behavior. This in turn could help to encourage the inclusion of variability as an  
357 additional endpoint, as it might provide new insights into the understanding of an individual's  
358 response to an external challenge.

359

## 360 **Material and Methods:**

### 361 ***Zebrafish husbandry***

362 Mixed wildtype (WM) zebrafish (*Danio rerio*), originally obtained from crosses between AB,  
363 Tübingen and a pet shop population (OBI, Leipzig, Germany) were maintained under  
364 standard conditions<sup>80</sup> in accordance with the Swiss animal protection law. Adult fish were  
365 maintained in a mixed sex Mass Embryo Production System (Aquatic Habitats®, Pentair  
366 Aquatic Eco-systems, USA), linked to a recirculating flow-through supplied with a mixture of  
367 tap and desalted water (1:1) at 26°C ± 1, under a 14:10h light/dark cycle. Adult fish were fed  
368 twice daily to satiation from a combination of dry flakes (Tetra, Germany) and live food  
369 (*Artemia nauplii*). Group crosses resulted in larvae for the behavioral trials, where the eggs  
370 were collected approximately 1 hour post fertilization (hpf). They were rinsed and incubated  
371 in aerated artificial freshwater (according to ISO-7346/3 guideline<sup>81</sup>) and unfertilized eggs  
372 were removed during the blastula stage as described by Kimmel *et al.* (1995)<sup>82</sup>. Fish were  
373 raised in petri dishes, approx. 50 per dish, until needed for behavioral experiments in an  
374 incubator with the same light and temperature conditions, as mentioned above, in ISO  
375 artificial freshwater, which was changed regularly. All experiments were carried out in  
376 accordance with the animal protection guidelines and experiments with larvae were approved  
377 by the cantonal veterinary office under the license ZH168/17.

378 ***Behavioral tracking and recording***

379 At 4 dpf, larvae were distributed into 48-well-plates (Greiner Bio-One, Austria), where 1 larva  
380 was placed into each well containing 500  $\mu$ l of fresh ISO water. Fish were moved in the  
381 morning and were returned to the housing incubator until the following day when behavioral  
382 experiments occurred. Behavior was recorded using the DanioVision Observation Chamber  
383 (v. DVOC-0040T; Noldus, Netherlands), which consists of a Gigabit Ethernet video camera,  
384 infrared and white light sources, and a transparent multi-well plate holder. The camera output  
385 was fed into a standard PC system with the EthoVision XT13 software (version 13.0.1220,  
386 Noldus, Netherlands) which created videos to later be analyzed for the fish movement.

387 Larvae were subjected to different protocols to allow thorough assessment of their  
388 movement. The first protocol consisted of an acclimation period of 20 minutes, to allow the  
389 fish to adjust to the Noldus set up and allow their baseline movement to settle, followed by a  
390 20 minutes measurement of spontaneous swimming behavior (referred to as “spontaneous”  
391 throughout the manuscript). This was then followed by alternating dark and light periods at  
392 10 minutes each (2x dark periods referred to as “dark intervals”, 2x light periods referred to  
393 as “light intervals”). Immediately following this protocol, the larvae’s responses to a short  
394 pulse of darkness was recorded as follows: Larvae were left for 90 seconds in light before  
395 being subjected to a 1 second pulse of darkness, which was repeated 4 times, with an inter-  
396 stimulus-interval (ISI) of 90 seconds to allow fish to settle down and reach the baseline in  
397 between each stimulus. This ISI was selected as it was shown by Pantoja *et al.* (2016)<sup>70</sup> to  
398 be sufficient to not cause fish to habituate to an acoustic stimulus. The same pattern was  
399 used for the tapping protocol but this time the stimulus was produced using the inbuilt  
400 DanioVision Tapping Device (Noldus, Netherlands)<sup>38</sup> which produces an acoustic vibrational  
401 stimulus. The swimming protocol was recorded at 30 frames per second while the startle  
402 protocols were recorded at 60 frames per second. All of the behavior protocols were run at  
403 9am and 2pm, on 5, 6 and 7 dpf, with all the protocols being the same for all measurements  
404 carried out. Between the measurements at 9am and 2pm, the well-plate was maintained

405 under light conditions in the testing room to most closely mimic their normal diurnal cycle.  
406 The 3 days experiment was repeated 3 times at different periods, producing a sample size of  
407  $n = 132$  larvae for behavioral analysis. There was no effect of the rep on the behavior of the  
408 larvae for any of the conditions tested (spontaneous:  $\chi^2 (1) = 0.18$ ,  $p = 0.672$ ; dark intervals:  
409  $\chi^2 (1) = 0.07$ ,  $p = 0.787$ ; spontaneous:  $\chi^2 (1) = 0.83$ ,  $p = 0.361$ ). In addition, there was no  
410 effect of location of the fish within the plate for any of the conditions tested (e.g. spontaneous  
411 swimming- well:  $\chi^2 (47) = 44.82$ ,  $p = 0.563$ ; column:  $\chi^2 (1) = 0.16$ ,  $p = 0.693$ ; row:  $\chi^2 (5) =$   
412  $4.79$ ,  $p = 0.442$ ).

### 413 ***Heart rate and morphological measurements***

414 At 4pm on each of the 3 days, videos were recorded of each larva for the measurement of  
415 heart rates and morphometric parameters. Larvae were anesthetized with 160 mg/L of ethyl  
416 3-aminobenzoate methanesulfonate (MS222; Sigma-Aldrich). A 15 seconds video of each  
417 larva in the lateral position was then captured, at 30 frames per second, using a Basler  
418 acA2000-165 $\mu$ M camera mounted on a Leica S8APO stereo microscope. Videos were  
419 recorded using the Media Recorder 4 software (version 4.0; Noldus, Netherlands). After a  
420 suitable video had been taken, larvae were immediately moved into a bath of 100% air  
421 saturated ISO water to allow recovery from the anesthetic. Recovered larvae were then  
422 moved to the same position of a new 48-well-plate containing 500  $\mu$ l of ISO water in each  
423 well and placed back into the incubator until the next behavioral measurements were taken.

424 From the videos collected, the heart rate and morphology parameters were measured using  
425 DanioScope Software (version 1.2.206; Noldus, Netherlands). After manually selecting the  
426 heart area in the video, the software calculated the number of beats per minute using a  
427 power plot spectrum of the frequencies extracted from an activity signal. For each larva, 3  
428 heart rate measurements were taken for each day from the same video and the average of  
429 these was taken as the heart rate for that larvae on that day. The morphology parameters  
430 measured were body length (from nose to tip of the tail; mm) and swim bladder (size of the  
431 swim bladder from the lateral view of the larvae; mm<sup>2</sup>), using the DanioScope software. The



432 same calibration profile was used for all images, to ensure comparability between each  
433 image.

#### 434 ***Data and statistical analysis***

435 Tracking of the fish by the EthoVision software was carried out from the videos in a non-live  
436 tracking mode, allowing a static subtraction of the background and reducing tracking  
437 artifacts. The same settings were ensured to give consistency across the different day, times  
438 and replicates. To characterize the swimming behaviors during the spontaneous, dark and  
439 light intervals, the activity and radial index were calculated. The activity index represents the  
440 percentage of movement by each larva within one-second intervals and was calculated  
441 within the software program using 2.00 to 1.75 cm/s as a threshold. The radial index  
442 indicated where the larva moved within the well and was calculated using the distance from  
443 center of the well (calculated in the EthoVision software) and dividing it by the radius of 5.725  
444 mm. To calculate the intra-individual coefficient of variance, standard deviation was divided  
445 by the mean activity for each individual larva.

446 For the startle response strength, the distance moved per second was used instead of the  
447 activity index. This did not affect the significance or trends that were observed with the  
448 activity index but allowed a more detailed view of the specific movements of the fish. The  
449 period one-second post stimulus was taken to analyze the distance moved by the fish while  
450 performing a startle response. To calculate the strength of each response with respect to  
451 spontaneous movement, a baseline for each fish was determined before each stimulus. The  
452 distance moved per second during a 40 second period, 10 seconds before the startle  
453 stimulus, was averaged and SD added to give baseline level of distance moved before the  
454 stimulus. The response strength was then calculated by subtracting the baseline from the  
455 distance moved during the startle stimulus. Using this baseline, the habituation index was  
456 calculated from ratios between the first strength response and either the second, third or  
457 fourth strength response. The sum of all ratios was taken as the habituation score for that  
458 larva. This score was calculated for each individual for each day and time.

459 All statistical analysis was carried out in 'RStudio' (version 1.1.453, USA). To carry out the  
460 correlation analysis, the Pearson's correlation coefficient,  $r$ , was calculated and reported, and  
461 the p-values to test this correlation obtained from a two-sided t-test. A linear regression  
462 model was used to draw lines of best fit for the scatter plots. To test between group  
463 differences and check for differences between conditions, analysis of variance models were  
464 carried out using the minimum adequate model approach, where model simplification using F  
465 test occurred based on analysis of deviance. Linear mixed effect analysis was carried out to  
466 test for positional effects of the well, as well as effects from the different repeats. Well  
467 location, column, row, edge and repeat were entered as fixed effects, while individual larva  
468 were entered as random effects. P values were obtained by likelihood ratio tests of the full  
469 model with the effect in question against the model without the effect. For all tests, data were  
470 considered statistically significant when  $p < 0.05$ .

471

## 472 **Data Availability**

473 The datasets generated and analyzed during the current study are available in the ERIC  
474 repository, <https://data.eawag.ch/>.

475

## 476 **References**

- 477 1 Naganawa, Y. & Hirata, H. Developmental transition of touch response from slow  
478 muscle-mediated coilings to fast muscle-mediated burst swimming in zebrafish. *Dev*  
479 *Biol* **355**, 194-204, doi:10.1016/j.ydbio.2011.04.027 (2011).
- 480 2 Saint-Amant, L. & Drapeau, P. Time course of the development of motor behaviors in  
481 the zebrafish embryo. *J Neurobiol* **37**, 622-632 (1998).
- 482 3 Budick, S. A. & O'Malley, D. M. Locomotor repertoire of the larval zebrafish:  
483 swimming, turning and prey capture. *J Exp Biol* **203**, 2565-2579 (2000).

- 484 4 Buss, R. R. & Drapeau, P. Synaptic drive to motoneurons during fictive swimming in  
485 the developing zebrafish. *J Neurophysiol* **86**, 197-210, doi:10.1152/jn.2001.86.1.197  
486 (2001).
- 487 5 Brustein, E. *et al.* Steps during the development of the zebrafish locomotor network. *J*  
488 *Physiol Paris* **97**, 77-86, doi:10.1016/j.jphysparis.2003.10.009 (2003).
- 489 6 Drapeau, P. *et al.* Development of the locomotor network in zebrafish. *Prog Neurobiol*  
490 **68**, 85-111 (2002).
- 491 7 Fero, K., Yokogawa, T. & Burgess, H. A. The Behavioral Repertoire of Larval  
492 Zebrafish. *Zebrafish Models in Neurobehavioral Research*, 249-291, doi:10.1007/978-  
493 1-60761-922-2\_12 (2011).
- 494 8 Farrell, T. C. *et al.* Evaluation of spontaneous propulsive movement as a screening  
495 tool to detect rescue of Parkinsonism phenotypes in zebrafish models. *Neurobiol Dis*  
496 **44**, 9-18, doi:10.1016/j.nbd.2011.05.016 (2011).
- 497 9 Ingebretson, J. J. & Masino, M. A. Quantification of locomotor activity in larval  
498 zebrafish: considerations for the design of high-throughput behavioral studies. *Front*  
499 *Neural Circuits* **7**, 109, doi:10.3389/fncir.2013.00109 (2013).
- 500 10 Legradi, J., el Abdellaoui, N., van Pomeran, M. & Legler, J. Comparability of  
501 behavioural assays using zebrafish larvae to assess neurotoxicity. *Environ Sci Pollut*  
502 *Res Int* **22**, 16277-16289, doi:10.1007/s11356-014-3805-8 (2015).
- 503 11 MacPhail, R. C. *et al.* Locomotion in larval zebrafish: Influence of time of day, lighting  
504 and ethanol. *Neurotoxicology* **30**, 52-58, doi:10.1016/j.neuro.2008.09.011 (2009).
- 505 12 Melvin, S. D., Petit, M. A., Duvignacq, M. C. & Sumpter, J. P. Towards improved  
506 behavioural testing in aquatic toxicology: Acclimation and observation times are  
507 important factors when designing behavioural tests with fish. *Chemosphere* **180**, 430-  
508 436, doi:10.1016/j.chemosphere.2017.04.058 (2017).
- 509 13 Melvin, S. D. & Wilson, S. P. The utility of behavioral studies for aquatic toxicology  
510 testing: a meta-analysis. *Chemosphere* **93**, 2217-2223,  
511 doi:10.1016/j.chemosphere.2013.07.036 (2013).

- 512 14 Padilla, S., Hunter, D. L., Padnos, B., Frady, S. & MacPhail, R. C. Assessing  
513 locomotor activity in larval zebrafish: Influence of extrinsic and intrinsic variables.  
514 *Neurotoxicol Teratol* **33**, 624-630, doi:10.1016/j.ntt.2011.08.005 (2011).
- 515 15 John, O. P., Robins, R. & Pervin, L. A. *Handbook of Personality. Theory and*  
516 *Research*. (1999).
- 517 16 Larsen, J. R. & Buss, D. *Personality Psychology: Domains of Knowledge about*  
518 *Human Nature*. (2005).
- 519 17 Drent, P. J., van Oers, K. & van Noordwijk, A. J. Realized heritability of personalities  
520 in the great tit (*Parus major*). *Proc Biol Sci* **270**, 45-51, doi:10.1098/rspb.2002.2168  
521 (2003).
- 522 18 Groothuis, T. G. & Carere, C. Avian personalities: characterization and epigenesis.  
523 *Neurosci Biobehav Rev* **29**, 137-150, doi:10.1016/j.neubiorev.2004.06.010 (2005).
- 524 19 Conrad, J. L., Weinersmith, K. L., Brodin, T., Saltz, J. B. & Sih, A. Behavioural  
525 syndromes in fishes: a review with implications for ecology and fisheries  
526 management. *J Fish Biol* **78**, 395-435, doi:10.1111/j.1095-8649.2010.02874.x (2011).
- 527 20 Gosling, S. D. From mice to men: what can we learn about personality from animal  
528 research? *Psychol Bull* **127**, 45-86 (2001).
- 529 21 Wolf, M. & Weissing, F. J. Animal personalities: consequences for ecology and  
530 evolution. *Trends in Ecology & Evolution* **27**, 452-461, doi:10.1016/j.tree.2012.05.001  
531 (2012).
- 532 22 Kappeler, P. & Kraus, C. Levels and mechanisms of behavioural variability. *Animal*  
533 *Behaviour: Evolution and Mechanisms*, 655-684, doi:10.1007/978-3-642-02624-9\_21  
534 (2010).
- 535 23 Laskowski, K. L. & Bell, A. M. Strong personalities, not social niches, drive individual  
536 differences in social behaviours in sticklebacks. *Anim Behav* **90**, 287-295,  
537 doi:10.1016/j.anbehav.2014.02.010 (2014).

- 538 24 Nikinmaa, M. & Anttila, K. Individual variation in aquatic toxicology: Not only  
539 unwanted noise. *Aquat Toxicol* **207**, 29-33, doi:10.1016/j.aquatox.2018.11.021  
540 (2019).
- 541 25 Dingemanse, N. J., Kazem, A. J., Reale, D. & Wright, J. Behavioural reaction norms:  
542 animal personality meets individual plasticity. *Trends Ecol Evol* **25**, 81-89,  
543 doi:10.1016/j.tree.2009.07.013 (2010).
- 544 26 Wolf, M. & Weissing, F. J. An explanatory framework for adaptive personality  
545 differences. *Philos Trans R Soc Lond B Biol Sci* **365**, 3959-3968,  
546 doi:10.1098/rstb.2010.0215 (2010).
- 547 27 Bennett, A. F. Interindividual variability: an underutilized resource. *New Directions in*  
548 *Ecological Physiology* **19**, 147-169 (1987).
- 549 28 Sih, A., Bell, A. M., Johnson, J. C. & Ziemba, R. E. Behavioral syndromes: an  
550 integrative overview. *Q Rev Biol* **79**, 241-277 (2004).
- 551 29 Roche, D. G., Careau, V. & Binning, S. A. Demystifying animal 'personality' (or not):  
552 why individual variation matters to experimental biologists. *J Exp Biol* **219**, 3832-  
553 3843, doi:10.1242/jeb.146712 (2016).
- 554 30 Williams, T. D. Individual variation in endocrine systems: moving beyond the 'tyranny  
555 of the Golden Mean'. *Philos Trans R Soc Lond B Biol Sci* **363**, 1687-1698,  
556 doi:10.1098/rstb.2007.0003 (2008).
- 557 31 Piersma, T. & Drent, J. P. Phenotypic flexibility and the evolution of organismal  
558 design. *Trends in Ecology & Evolution* **18**, 228-233, doi:10.1016/S0169-  
559 5347(03)00036-3 (2003).
- 560 32 Stamps, J. A., Briffa, M. & Biro, P. A. Unpredictable animals: individual differences in  
561 intraindividual variability (IIV). *Animal Behaviour* **83**, 1325-1334,  
562 doi:10.1016/j.anbehav.2012.02.017 (2012).
- 563 33 Hayes, J. P. & Jenkins, S. H. Individual Variation in Mammals. *Journal of Mammalogy*  
564 **78**, 274-293, doi:10.2307/1382882 (1997).

- 565 34 Burgess, H. A. & Granato, M. Modulation of locomotor activity in larval zebrafish  
566 during light adaptation. *J Exp Biol* **210**, 2526-2539, doi:10.1242/jeb.003939 (2007).
- 567 35 Emran, F., Rihel, J. & Dowling, J. E. A behavioral assay to measure responsiveness  
568 of zebrafish to changes in light intensities. *J Vis Exp*, doi:10.3791/923 (2008).
- 569 36 Fernandes, A. M. *et al.* Deep brain photoreceptors control light-seeking behavior in  
570 zebrafish larvae. *Curr Biol* **22**, 2042-2047, doi:10.1016/j.cub.2012.08.016 (2012).
- 571 37 Horstick, E. J., Bayleyen, Y., Sinclair, J. L. & Burgess, H. A. Search strategy is  
572 regulated by somatostatin signaling and deep brain photoreceptors in zebrafish. *BMC*  
573 *Biol* **15**, 4, doi:10.1186/s12915-016-0346-2 (2017).
- 574 38 Noldus, L. P. <https://www.noldus.com/daniovision/tapping-device>.
- 575 39 Roman, A. C. *et al.* Histone H4 acetylation regulates behavioral inter-individual  
576 variability in zebrafish. *Genome Biol* **19**, 55, doi:10.1186/s13059-018-1428-y (2018).
- 577 40 Parichy, D. M., Elizondo, M. R., Mills, M. G., Gordon, T. N. & Engeszer, R. E. Normal  
578 table of postembryonic zebrafish development: staging by externally visible anatomy  
579 of the living fish. *Dev Dyn* **238**, 2975-3015, doi:10.1002/dvdy.22113 (2009).
- 580 41 Robertson, G. N., McGee, C. A., Dumbarton, T. C., Croll, R. P. & Smith, F. M.  
581 Development of the swimbladder and its innervation in the zebrafish, *Danio rerio*. *J*  
582 *Morphol* **268**, 967-985, doi:10.1002/jmor.10558 (2007).
- 583 42 Bierbach, D., Laskowski, K. L. & Wolf, M. Behavioural individuality in clonal fish arises  
584 despite near-identical rearing conditions. *Nat Commun* **8**, 15361,  
585 doi:10.1038/ncomms15361 (2017).
- 586 43 Freund, J. *et al.* Emergence of individuality in genetically identical mice. *Science* **340**,  
587 756-759, doi:10.1126/science.1235294 (2013).
- 588 44 Baker, M. R., Goodman, A. C., Santo, J. B. & Wong, R. Y. Repeatability and reliability  
589 of exploratory behavior in proactive and reactive zebrafish, *Danio rerio*. *Sci Rep* **8**,  
590 12114, doi:10.1038/s41598-018-30630-3 (2018).
- 591 45 de Esch, C. *et al.* Locomotor activity assay in zebrafish larvae: influence of age, strain  
592 and ethanol. *Neurotoxicol Teratol* **34**, 425-433, doi:10.1016/j.ntt.2012.03.002 (2012).

- 593 46 Gao, Y. *et al.* Computational classification of different wild-type zebrafish strains  
594 based on their variation in light-induced locomotor response. *Comput Biol Med* **69**, 1-  
595 9, doi:10.1016/j.compbimed.2015.11.012 (2016).
- 596 47 Lange, M. *et al.* Inter-individual and inter-strain variations in zebrafish locomotor  
597 ontogeny. *PLoS One* **8**, e70172, doi:10.1371/journal.pone.0070172 (2013).
- 598 48 Moretz, J. A., Martins, E. P. & Robison, B. D. Behavioral syndromes and the evolution  
599 of correlated behavior in zebrafish. *Behavioral Ecology* **18**, 556-562,  
600 doi:10.1093/beheco/arm011 (2007).
- 601 49 Vignet, C. *et al.* Systematic screening of behavioral responses in two zebrafish  
602 strains. *Zebrafish* **10**, 365-375, doi:10.1089/zeb.2013.0871 (2013).
- 603 50 Dunn, T. W. *et al.* Brain-wide mapping of neural activity controlling zebrafish  
604 exploratory locomotion. *Elife* **5**, e12741, doi:10.7554/eLife.12741 (2016).
- 605 51 Gahtan, E., Tanger, P. & Baier, H. Visual prey capture in larval zebrafish is controlled  
606 by identified reticulospinal neurons downstream of the tectum. *J Neurosci* **25**, 9294-  
607 9303, doi:10.1523/JNEUROSCI.2678-05.2005 (2005).
- 608 52 Preuss, S. J., Trivedi, C. A., vom Berg-Maurer, C. M., Ryu, S. & Bollmann, J. H.  
609 Classification of object size in retinotectal microcircuits. *Curr Biol* **24**, 2376-2385,  
610 doi:10.1016/j.cub.2014.09.012 (2014).
- 611 53 Burgess, H. A., Schoch, H. & Granato, M. Distinct retinal pathways drive spatial  
612 orientation behaviors in zebrafish navigation. *Curr Biol* **20**, 381-386,  
613 doi:10.1016/j.cub.2010.01.022 (2010).
- 614 54 Mueller, K. P. & Neuhauss, S. C. Behavioral neurobiology: how larval fish orient  
615 towards the light. *Curr Biol* **20**, R159-161, doi:10.1016/j.cub.2009.12.028 (2010).
- 616 55 Clift, D., Richendrfer, H., Thorn, R. J., Colwill, R. M. & Creton, R. High-throughput  
617 analysis of behavior in zebrafish larvae: effects of feeding. *Zebrafish* **11**, 455-461,  
618 doi:10.1089/zeb.2014.0989 (2014).
- 619 56 Dametto, F. S. *et al.* Feeding regimen modulates zebrafish behavior. *PeerJ* **6**, e5343,  
620 doi:10.7717/peerj.5343 (2018).

- 621 57 Hernandez, R. E., Galitan, L., Cameron, J., Goodwin, N. & Ramakrishnan, L. Delay of  
622 Initial Feeding of Zebrafish Larvae Until 8 Days Postfertilization Has No Impact on  
623 Survival or Growth Through the Juvenile Stage. *Zebrafish* **15**, 515-518,  
624 doi:10.1089/zeb.2018.1579 (2018).
- 625 58 Tran, S. & Gerlai, R. Individual differences in activity levels in zebrafish (*Danio rerio*).  
626 *Behav Brain Res* **257**, 224-229, doi:10.1016/j.bbr.2013.09.040 (2013).
- 627 59 Edenbrow, M. & Croft, D. P. Environmental and genetic effects shape the  
628 development of personality traits in the mangrove killifish *Kryptolebias marmoratus*.  
629 *Oikos* **122**, 667-681, doi:10.1111/j.1600-0706.2012.20556.x (2013).
- 630 60 Schlupp, I. Chapter 5 Behavior of Fishes in the Sexual/Unisexual Mating System of  
631 the Amazon Molly (*Poecilia formosa*). *Advances in the Study of Behavior* **39**, 153-  
632 183, doi:10.1016/S0065-3454(09)39005-1 (2009).
- 633 61 Chapman, B. B., Ward, A. J. W. & Krause, J. Schooling and learning: early social  
634 environment predicts social learning ability in the guppy, *Poecilia reticulata*. *Animal*  
635 *Behaviour* **76**, 923-929, doi:10.1016/j.anbehav.2008.03.022 (2008).
- 636 62 Frost, A. J., Winrow-Giffen, A., Ashley, P. J. & Sneddon, L. U. Plasticity in animal  
637 personality traits: does prior experience alter the degree of boldness? *Proc Biol Sci*  
638 **274**, 333-339, doi:10.1098/rspb.2006.3751 (2007).
- 639 63 Arnold, C. & Taborsky, B. Social experience in early ontogeny has lasting effects on  
640 social skills in cooperatively breeding cichlids. *Animal Behaviour* **79**, 621-630,  
641 doi:10.1016/j.anbehav.2009.12.008 (2010).
- 642 64 Bergmuller, R. & Taborsky, M. Animal personality due to social niche specialisation.  
643 *Trends Ecol Evol* **25**, 504-511, doi:10.1016/j.tree.2010.06.012 (2010).
- 644 65 Eaton, R. C., Bombardieri, R. A. & Meyer, D. L. The Mauthner-initiated startle  
645 response in teleost fish. *J Exp Biol* **66**, 65-81 (1977).
- 646 66 Kimmel, C. B., Patterson, J. & Kimmel, R. O. The development and behavioral  
647 characteristics of the startle response in the zebra fish. *Dev Psychobiol* **7**, 47-60,  
648 doi:10.1002/dev.420070109 (1974).



- 649 67 Troconis, E. L. *et al.* Intensity-dependent timing and precision of startle response  
650 latency in larval zebrafish. *J Physiol* **595**, 265-282, doi:10.1113/JP272466 (2017).
- 651 68 Best, J. D. *et al.* Non-associative learning in larval zebrafish.  
652 *Neuropsychopharmacology* **33**, 1206-1215, doi:10.1038/sj.npp.1301489 (2008).
- 653 69 Wolman, M. A., Jain, R. A., Liss, L. & Granato, M. Chemical modulation of memory  
654 formation in larval zebrafish. *Proc Natl Acad Sci U S A* **108**, 15468-15473,  
655 doi:10.1073/pnas.1107156108 (2011).
- 656 70 Pantoja, C. *et al.* Neuromodulatory Regulation of Behavioral Individuality in Zebrafish.  
657 *Neuron* **91**, 587-601, doi:10.1016/j.neuron.2016.06.016 (2016).
- 658 71 Hawkins, D. K. & Quinn, T. P. Critical swimming velocity and associated morphology  
659 of juvenile coastal cutthroat trout (*Oncorhynchus clarki clarki*), steelhead trout  
660 (*Oncorhynchus mykiss*), and their hybrids. *Canadian Journal of Fisheries and Aquatic*  
661 *Sciences* **53**, 1487-1496, doi:10.1139/f96-085 (1996).
- 662 72 Ojanguren, A. F. & Braña, F. Effects of size and morphology on swimming  
663 performance in juvenile brown trout (*Salmo trutta* L.). *Ecology of Freshwater Fish* **12**,  
664 241-246, doi:10.1046/j.1600-0633.2003.00016.x (2003).
- 665 73 Roy, T. & Bhat, A. Population, sex and body size: determinants of behavioural  
666 variations and behavioural correlations among wild zebrafish *Danio rerio*. *R Soc*  
667 *Open Sci* **5**, 170978, doi:10.1098/rsos.170978 (2018).
- 668 74 Wilson, A. D. M. & Godin, J.-G. J. Boldness and intermittent locomotion in the bluegill  
669 sunfish, *Lepomis macrochirus*. *Behavioral Ecology* **21**, 57-62,  
670 doi:10.1093/beheco/arp157 (2009).
- 671 75 Colwill, R. M. & Creton, R. Locomotor behaviors in zebrafish (*Danio rerio*) larvae.  
672 *Behav Processes* **86**, 222-229, doi:10.1016/j.beproc.2010.12.003 (2011).
- 673 76 Ali, S., Champagne, D. L. & Richardson, M. K. Behavioral profiling of zebrafish  
674 embryos exposed to a panel of 60 water-soluble compounds. *Behav Brain Res* **228**,  
675 272-283, doi:10.1016/j.bbr.2011.11.020 (2012).

- 676 77 de Esch, C., Sliker, R., Wolterbeek, A., Woutersen, R. & de Groot, D. Zebrafish as  
677 potential model for developmental neurotoxicity testing: a mini review. *Neurotoxicol*  
678 *Teratol* **34**, 545-553, doi:10.1016/j.ntt.2012.08.006 (2012).
- 679 78 Legradi, J. B. *et al.* An ecotoxicological view on neurotoxicity assessment.  
680 *Environmental Sciences Europe* **30**, 46, doi:10.1186/s12302-018-0173-x (2018).
- 681 79 Tierney, K. B. Behavioural assessments of neurotoxic effects and neurodegeneration  
682 in zebrafish. *Biochim Biophys Acta* **1812**, 381-389, doi:10.1016/j.bbadis.2010.10.011  
683 (2011).
- 684 80 Westerfield, M. *The Zebrafish Book. A Guide for The Laboratory Use of Zebrafish*  
685 *(Danio rerio)*. Vol. 385 (2000).
- 686 81 ISO. Water quality — Determination of the acute lethal toxicity of substances to a  
687 freshwater fish [Brachydanio rerio Hamilton-Buchanan (Teleostei, Cyprinidae)] — Part  
688 3: Flow-through method: ISO 7346-3:1996(en). *ISO International Standards*, 11  
689 (1996).
- 690 82 Kimmel, C. B., Ballard, W. W., Kimmel, S. R., Ullmann, B. & Schilling, T. F. Stages of  
691 embryonic development of the zebrafish. *Dev Dyn* **203**, 253-310,  
692 doi:10.1002/aja.1002030302 (1995).

693

## 694 **Acknowledgements**

695 We would like to thank Pascal Reichlin, Marianne Zimmermann and Hidir Sengül for expert  
696 fish care. We would also like to thank Roman Li and Anze Zupanic for critical comments on  
697 the manuscript. We are grateful to the whole Utox department for fruitful discussions and  
698 helpful suggestions throughout the study.

699

## 700 **Author Contributions**

701 C.M.vB conceived the study; K.T.K and C.M.vB designed and carried out the preliminary  
702 experiments; J.A.F performed the experiments and carried out the analysis; C.P.Z and J.A.F

703 programmed the analysis tools; J.A.F and C.M.vB wrote the manuscript. All authors critically  
704 revised the manuscript and confirmed the last version.

705

706 **Additional Information**

707 The authors declare no competing interests.

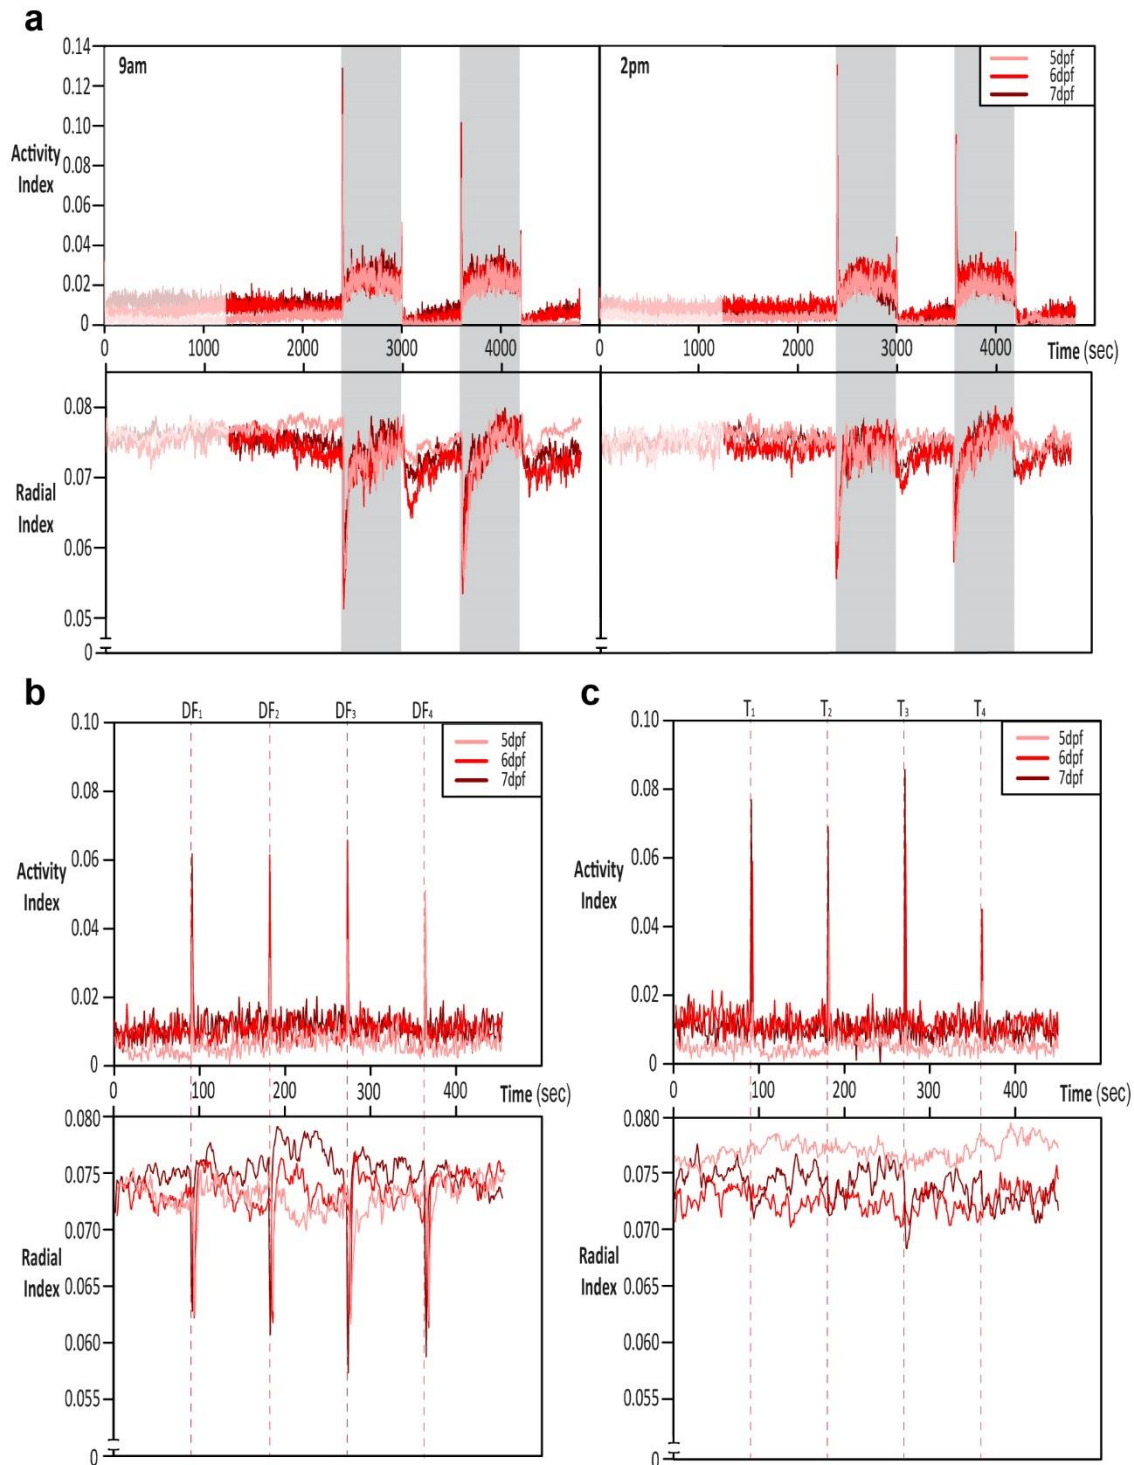

708

709 **Figure 1.** Time series plots from behavior experiments. a) Average activity index (top) and  
710 radial index (bottom) of 132 zebrafish larvae over the study period under light or dark period  
711 at either 9am or 2pm for 5, 6 or 7 dpf. Initial 20 minutes acclimation period (faded period),  
712 followed by 20 minutes of “spontaneous” swimming, then swimming under darkness (2 x 10  
713 min, referred to as “dark intervals”, shaded period) and swimming in light after periods of

714 darkness (2 x 10 min, referred to as “light intervals”). For the startle triggers of b) dark flashes  
715 (DF) and c) tapping (T) average activity for 9am measurements are shown. The dashed lines  
716 indicate occurrence of the stimuli.

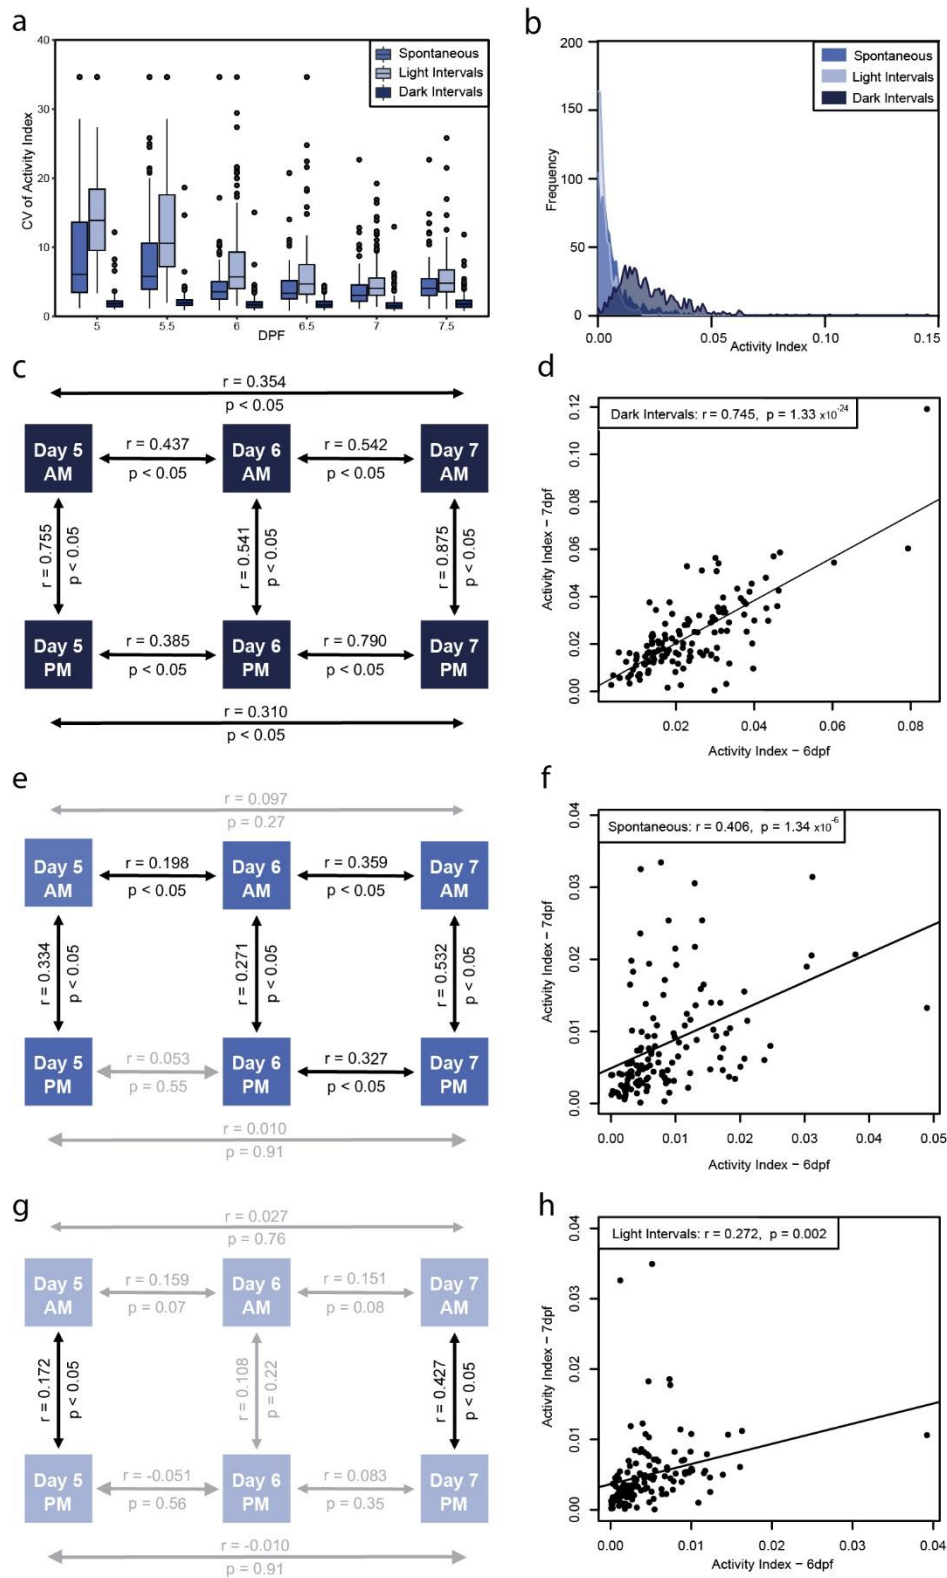

717

718 **Figure 2.** Behavioral intra-individual variability in a population of 132 larvae for the activity

719 index. a) Boxplot of the coefficient of variance of activity index for each individual larva

720 ( $n=132$ ) over the different days and daytimes (days post fertilization; dpf) under the different

721 conditions studied. b) Frequency distribution of the activity index in spontaneous, light and

722 dark intervals depicting the differential activity profiles under these conditions. Schematics  
723 represent correlations of activity between different days and times of day for each of the  
724 conditions of study, c) dark intervals, e) spontaneous and g) light intervals. Correlation plots  
725 between activity of larvae on day 6 vs 7 for d) dark intervals, f) spontaneous and e) light  
726 intervals. Statistics on the plots represent the Pearson's correlation coefficient and respective  
727 p value, with a linear regression line fitted for visual aid on the scatter plots.

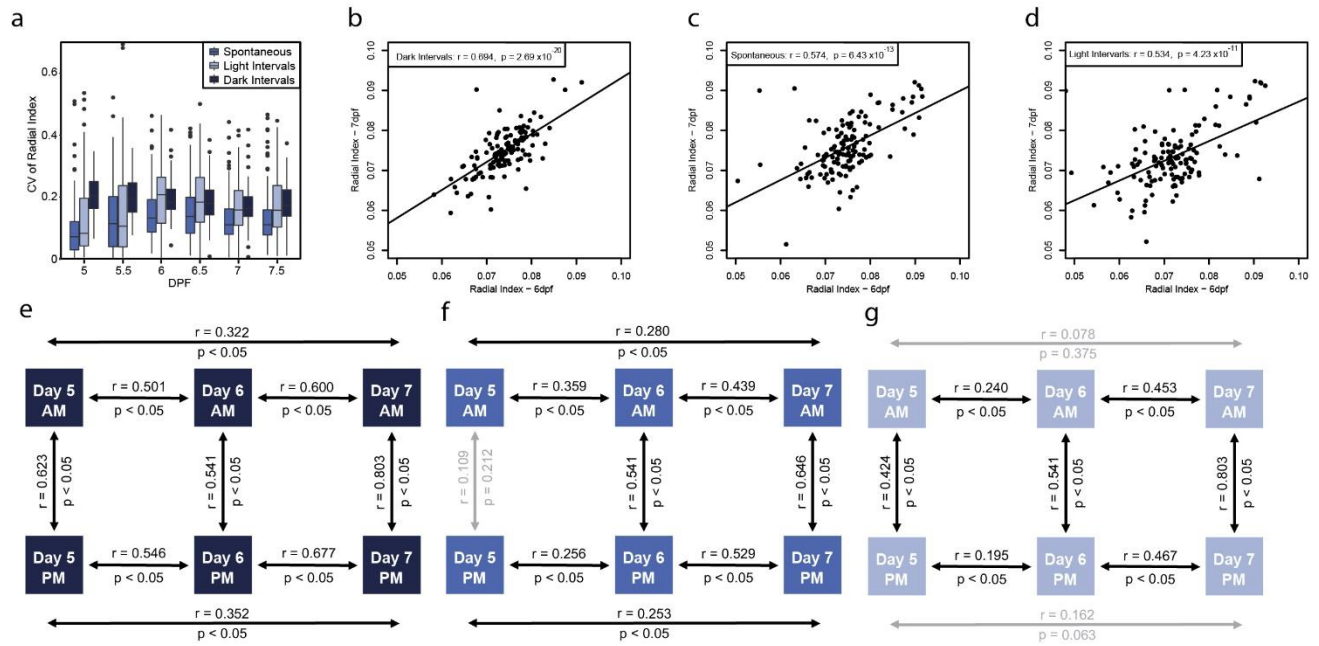

728

729

730 **Figure 3.** Behavioral intra-individual variability in a population of 132 larvae for the radial

731 index. a) Boxplot of the coefficient of variance of radial index for each individual larva (n=132)

732 over the different days and daytimes (days post fertilization; dpf) under the different

733 conditions studied. Correlation plots between the radial index of larvae on day 6 vs 7 for b)

734 dark intervals, c) spontaneous and d) light intervals. Schematics represent correlations of the

735 radial index between different days and times of day for each of the conditions of study, e)

736 dark intervals, f) spontaneous and g) light intervals. Statistics on the plots represent the

737 Pearson's correlation coefficient and respective p value, with a linear regression line fitted for

738 visual aid on the scatter plots.

739



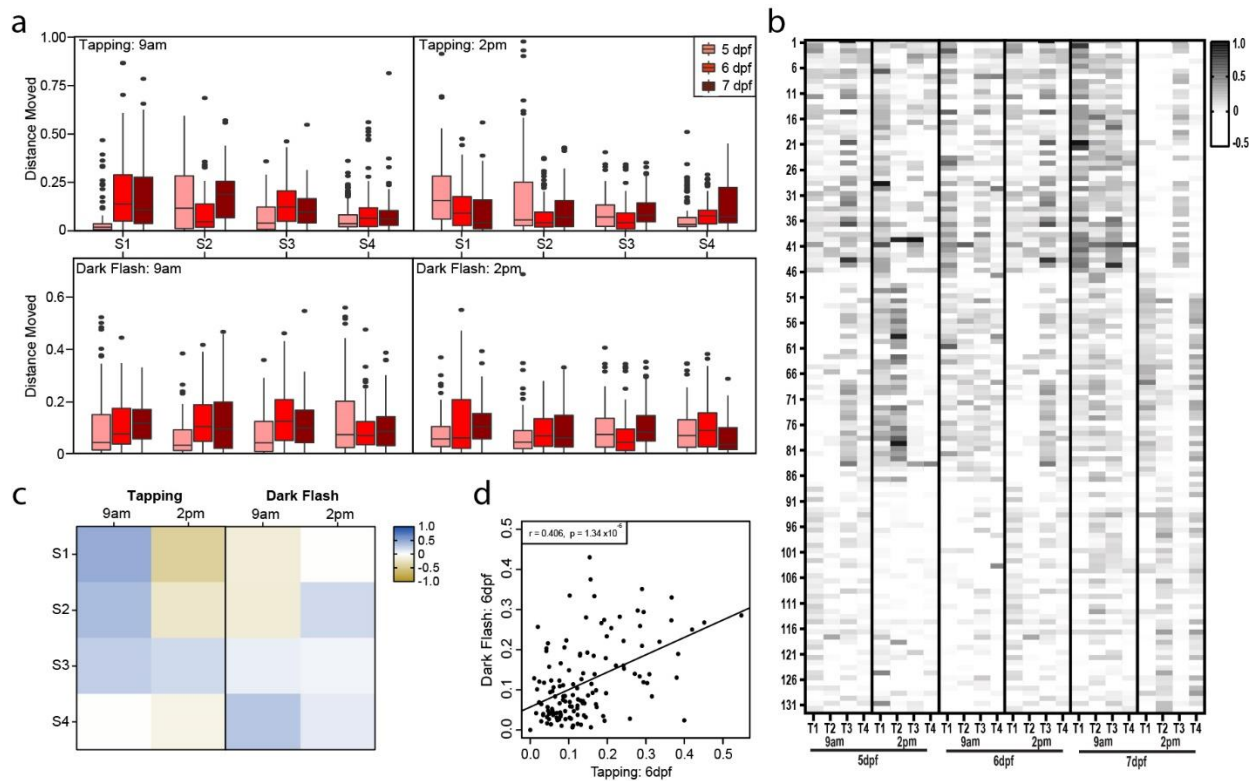

740

741

742 **Figure 4.** Individual responses to startle stimulus. a) Boxplots of the average distance moved  
 743 of the 132 larvae at each of the stimulus (S1-S4) (tap or dark flash) at either 9am or 2pm.  
 744 The different color boxes represent the three different days measured on 5, 6 and 7 days  
 745 post fertilization (dpf). b) Heat map representing the change in distance moved with respect  
 746 to the baseline of each individual larvae for all time points and days measured in response to  
 747 the each of the tapping stimulus (T1-T4). White represents no response to the stimulus, with  
 748 the grey scale darkening in a linear scale depending on the strength of the response. c) Heat  
 749 map of the r values from the correlations of distance moved of individual larvae between 6  
 750 and 7 dpf, for each of the 4 startle stimuli at either 9am or 2pm for tapping and dark flashes.  
 751 Blue represents a positive correlation, with yellow representing a negative correlation. d)  
 752 Correlation plot between the individual fish response to the first dark flash and the first tap at  
 753 6 dpf. Each point on the graph represents an individual larva (n=132) and the correlation  
 754 coefficient was calculated using Pearson's correlation, with a linear regression line fitted for  
 755 visual aid.

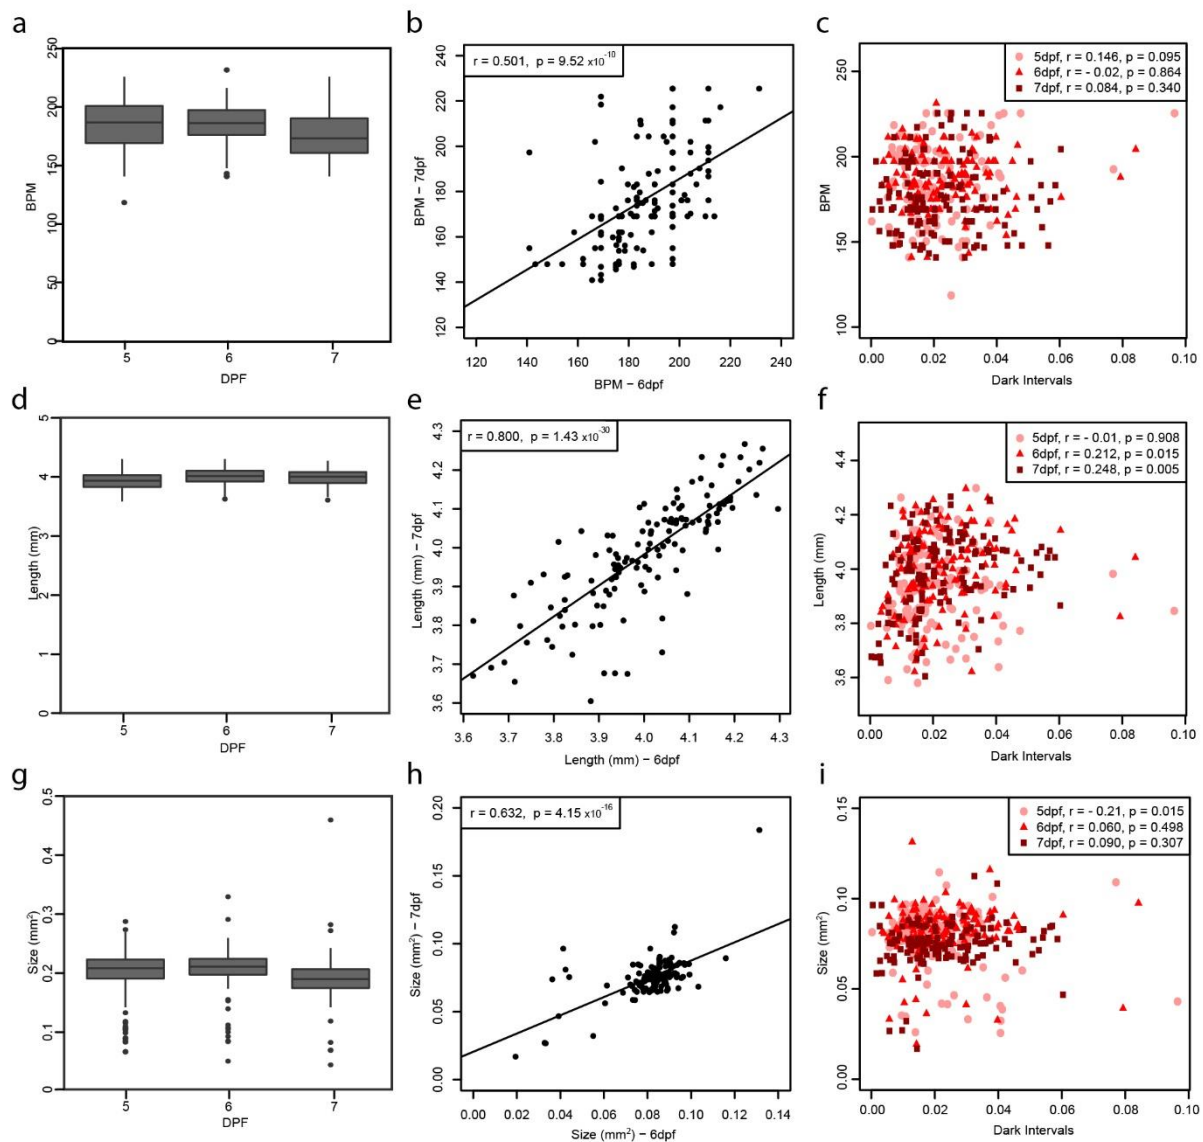

756

757 **Figure 5.** Physiology and morphometric parameter comparisons. Boxplots representing the  
 758 average measure of a) heart rate (beats per minute; BPM), d) body length (mm) and g) size  
 759 of swim bladder (mm<sup>2</sup>), over the three days of experiments (5, 6 and 7 days post fertilization,  
 760 dpf) with significant difference represented by different letters on each graph. Correlation  
 761 plots between 6 and 7 dpf for b) heart rate, e) body length and h) size of swim bladder, with  
 762 each point representing a single larva. Comparison of the individuals' c) heart rate, f) body  
 763 length and i) size of swim bladder to their respective average activity during dark intervals,  
 764 with each day plotted on each plot (5 dpf: circle, 6 dpf; triangle and 7 dpf; square). Statistics  
 765 on the plots represent the Pearson's correlation coefficient and respective p value, with a  
 766 linear regression line fitted for visual aid on the scatter plots.
